# Supplementary material for: Genetic knockdown of genes that are obscure, conserved and essential using CRISPR interference methods in the fission yeast S. pombe
Source: Oxford University Press journal article supplement (doi:10.1242/jcs.261186), 2023-05-01
Supplement: jcs261186supp.pdf [file jcs261186supp.pdf]

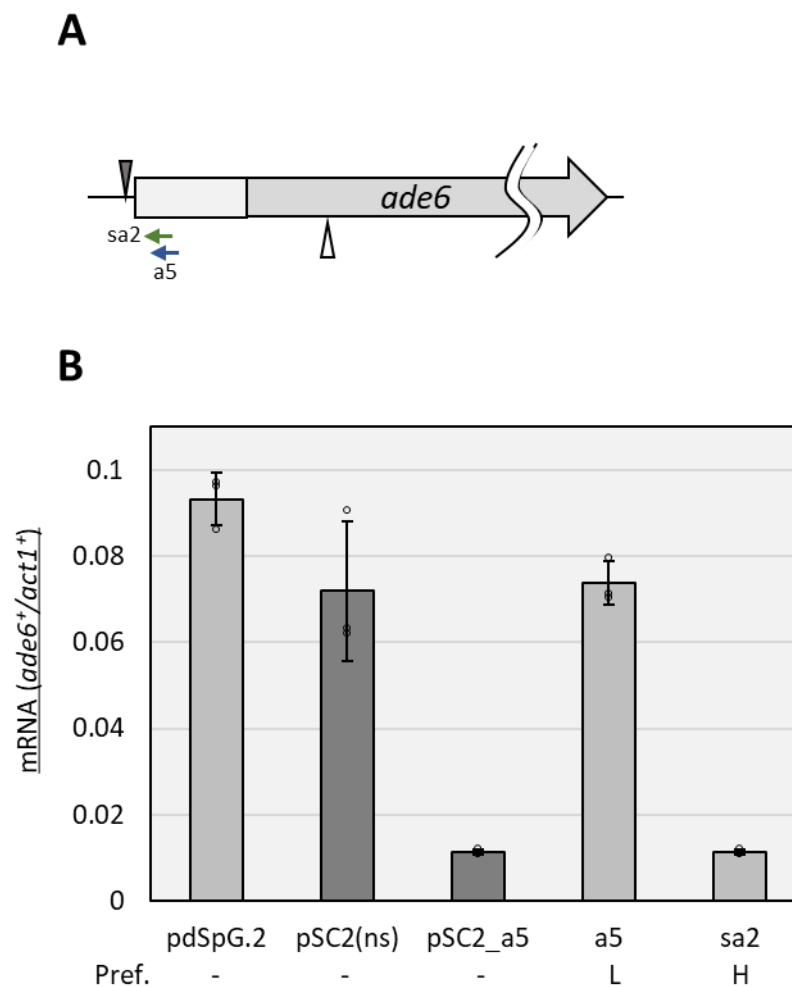

**Fig. S1. An example of a targeting sequence that is effective with dCas9, but not with dSpG.** (A) Targeting sequences designed for the *ade6*<sup>+</sup> gene. Arrows indicate targeting sequences of sgRNAs that bind the non-template strand of the targeted DNA. Blue arrow is a targeting sequence suitable for dCas9. The green arrow is suitable for dSpG. PAM sequences are situated at the immediate 3'-side of the arrowheads (not shown in the diagram). A gray triangle indicates the TSS. A white triangle indicates the position of 90 bp downstream from the TSS. A light gray box indicates the 5'UTR. (B) Quantification of *ade6*<sup>+</sup> mRNA. mRNA of *ade6*<sup>+</sup> and *act1*<sup>+</sup> was quantified by RT-qPCR. Relative mRNA amounts of *ade6*<sup>+</sup> normalized by that of *act1*<sup>+</sup> are presented. Dark gray bars indicate results of dCas9-mediated methods. Light bars indicate results of dSpG-mediated methods. Data show means +/- standard deviation from three biological replicates. Open circles indicate individual data points. Data of pSC2 (n.s.), pSC2\_a5, pdSpG.2, and sa2 are identical to those presented in the main Figure 2.

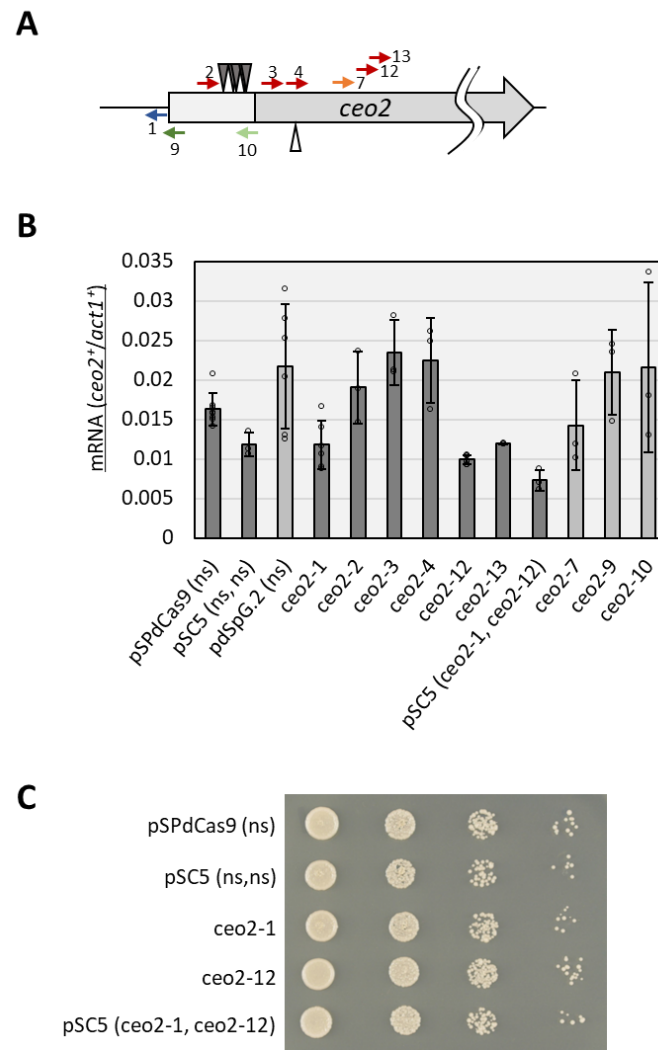

**Fig. S2. Knockdown of *ceo2*<sup>+</sup> using CRISPRi methods.**

(A) Targeting sequences designed for the *ceo2*<sup>+</sup> gene. Red and blue arrows indicate targeting sequences of sgRNAs that base-pair with the template and non-template strand of the targeted DNA respectively for the dCas9-mediated CRISPRi. Orange and green arrows indicate ones for dSpG-mediated CRISPRi (high preference, *ceo2*-9; moderate preference, *ceo2*-10, *ceo2*-7). PAM sequences are situated at the immediate 3'-side of the arrowheads (not shown in the diagram). Gray triangle, TSS; white triangle, the position of 90 bp downstream from the TSS; light gray box, 5'UTR

(B) Quantification of mRNA. mRNA of indicated gene and *act1*<sup>+</sup> was quantified by RT-qPCR. Relative mRNA amounts of target genes normalized by that of *act1*<sup>+</sup> are presented. Dark gray bars indicate results of dCas9-mediated methods. Light gray bars indicate results of dSpG-mediated methods. Data show means +/- standard deviation from at least three biological replicates (pSPdCas9 (ns), n = 8; pdSpG.2 (ns), n = 6; *ceo2*-1, n = 6; others, n = 3). ns, nonsense targeting sequence; open circle, individual data point

(C) Serial dilution (10-fold) spot test growth assays of fission yeast cells bearing CRISPRi plasmids with the indicated targeting sequences, on the EMM2 plate.

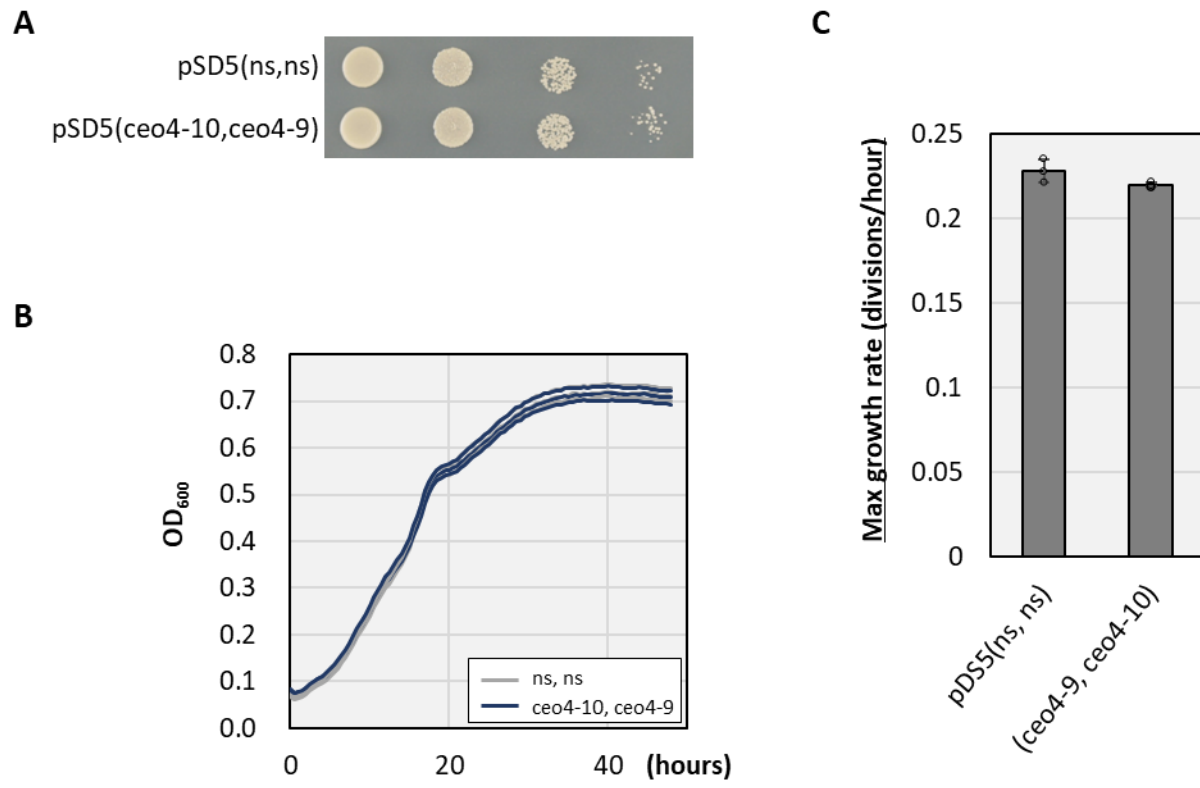

**Fig. S3. Growth rate phenotype of the *ceo4*<sup>+</sup> knockdown strain.**

(A) Serial dilution (10-fold) spot test growth assays of fission yeast cells bearing CRISPRi plasmids with the indicated targeting sequences, on an EMM2 plate.

(B) Time course measurement of OD<sub>600</sub> after CRISPRi induction. Fission yeast cells carrying CRISPRi plasmids were grown in a microplate reader with OD<sub>600</sub> measurements every 30 min after CRISPRi induction (see Materials and Methods for details). Results of three biological replicates are shown for each strain.

(C) Maximum growth rate (divisions/hour) calculated from results in the panel (B). Results show means +/- standard deviation from three biological replicates. Open circles indicate individual data points.

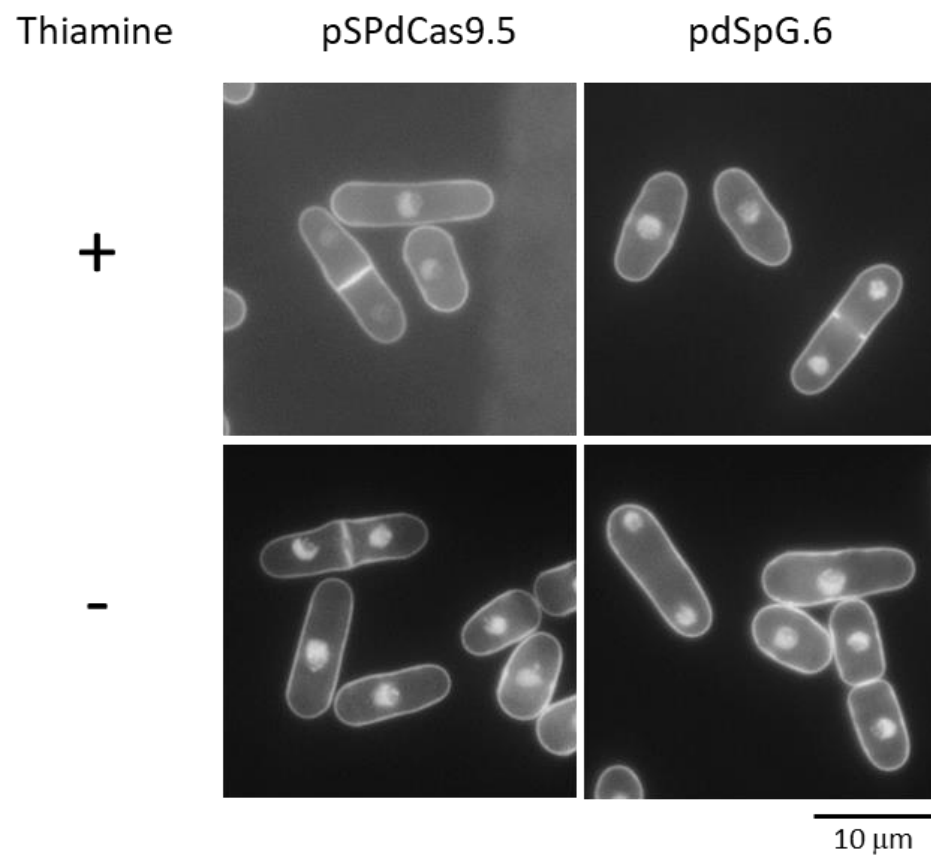

**Fig. S4. Cell morphology of control strains for double sgRNA repression.**

Fission yeast strains carrying control plasmids pSPdCas9.5 or pdSpG.6 were analyzed for cellular morphology. Fission yeast cells before (thiamine +) and after (thiamine -) 48 h of CRISPRi induction were fixed with 2.5% glutaraldehyde and stained with DAPI, followed by fluorescence microscopy (see Materials and Methods for details). A scale bar indicates 10  $\mu\text{m}$ . The pdSpG.6 plasmid has nonsense targeting sequences of the BbsI cloning site (sgRNA1) and a random sequence (sgRNA2) instead of the PaqCI cloning site. pdSpG.6 was used instead of pdSpG.5, because pdSpG.5 inhibited cell proliferation in culture conditions of this experiment while pdSpG.6 did not affect cell proliferation.

**Table S1. human orthologs of *ceo* genes are involved in human health**

| gene name   | human ortholog | essential in human cancer cell lines       | human diseases caused by mutation                           | molecular function              | references                                    |
|-------------|----------------|--------------------------------------------|-------------------------------------------------------------|---------------------------------|-----------------------------------------------|
| <i>ceo1</i> | TMEM97         | -                                          | - <sup>c</sup>                                              | cellular cholesterol regulation | Wilcox et al., 2007                           |
| <i>ceo2</i> | PPA1, PPA2     | KBM7, HAP1, K562, Jioye, Raji <sup>a</sup> | sudden cardiac failure                                      | pyrophosphatase                 | Curbo et al., 2006<br>Guimier et al., 2016    |
| <i>ceo3</i> | RDH14          | -                                          | intellectual disability, cerebellar atrophy                 | retinol reductase               | Belyaeva et al., 2002<br>Pastore et al., 2021 |
| <i>ceo4</i> | C2orf76        | -                                          | -                                                           | -                               |                                               |
| <i>ceo5</i> | TTC27          | KBM7, HAP1, K562, Jioye, Raji <sup>a</sup> | -                                                           | -                               |                                               |
| <i>ceo6</i> | NCDN           | - <sup>b</sup>                             | Neurodevelopmental disorder with infantile epileptic spasms | mGluR5 signaling regulation     | Wang et al., 2009<br>Fatima et al., 2021      |
| <i>ceo7</i> | ATXN10         | KBM7, HAP1 <sup>a</sup>                    | spinocerebellar ataxia type 10                              | -                               | Matsuura et al., 2000                         |

a, (Wang et al., 2015; Blomen et al., 2015); b, predicted essential gene for humans (Georgi et al., 2013); c, related to cancer malignancy (Wilcox et al., 2007)

**Table S2. oligo DNA list**

| ID     | purpose                    | targeting<br>sequence ID | sequence (5'-)                     |
|--------|----------------------------|--------------------------|------------------------------------|
| KI1240 | pSPdCas9.3<br>construction | nonsense<br>(PaqCI site) | cacc-TTCAGCAGGTGGACACCTGCCTTA      |
| KI1241 | pSPdCas9.3<br>construction | nonsense<br>(PaqCI site) | aaac-TAAGGCAGGTGTCCACCTGCTGAA      |
| KI1169 | pSPdCas9.5<br>construction | NA                       | cgggatcc-GGCGACCATGGAAATAACTATATCC |
| KI1248 | pSPdCas9.5<br>construction | NA                       | CAGGGAAATCATAACATAGTATAATAGGAA     |
| KI1423 | pdSpG.2<br>construction    | NA                       | AAGGACGACTCCATCGACAAC              |
| KI1424 | pdSpG.2<br>construction    | NA                       | AGCTGAGACAGGTCGATCC                |
| KI1425 | pdSpG.2<br>construction    | NA                       | AGAGCATCACCGGCCTGTAC               |
| KI1426 | pdSpG.2<br>construction    | NA                       | TTGTCGCTTCTGGTCAGCAC               |
| KI1024 | targeting seq.             | a5                       | cacc-GATGAAGTATGTATATACCT          |
| KI1025 | targeting seq.             | a5                       | aaac-AGGTATATACATACTTCATC          |
| KI1046 | targeting seq.             | a10                      | cacc-AAACATCAAATGCATCATCT          |
| KI1047 | targeting seq.             | a10                      | aaac-AGATGATGCATTTGATGTTT          |
| KI1533 | targeting seq.             | sa1                      | cacc-CATTACCATCTCATTAAAGC          |
| KI1534 | targeting seq.             | sa1                      | aaac-GCTTAATGAGATGGTAAATG          |
| KI1535 | targeting seq.             | sa2                      | cacc-ACCTTGGCAGCTCAGCTTAA          |
| KI1536 | targeting seq.             | sa2                      | aaac-TTAAGCTGAGCTGCCAAGGT          |
| KI1537 | targeting seq.             | sa3                      | cacc-ATGAAGTATGTATATACCTT          |
| KI1538 | targeting seq.             | sa3                      | aaac-AAGGTATATACATACTTCAT          |
| KI1539 | targeting seq.             | sa4                      | cacc-TATACATACTTCATCGAATA          |
| KI1540 | targeting seq.             | sa4                      | aaac-TATTCGATGAAGTATGTATA          |
| KI1541 | targeting seq.             | sa5                      | cacc-CAATTGGGCCGAATGATGGT          |
| KI1542 | targeting seq.             | sa5                      | aaac-ACCATCATTCGGCCCAATTG          |

|        |                |         |                            |
|--------|----------------|---------|----------------------------|
| KI1543 | targeting seq. | sa6     | cacc-TTGGGCCGAATGATGGTAGA  |
| KI1544 | targeting seq. | sa6     | aaac-TCTACCATCATTCGGCCCAA  |
| KI1545 | targeting seq. | sa7     | cacc-CCCATCGCTTAAACATCAAA  |
| KI1546 | targeting seq. | sa7     | aaac-TTTGATGTTTAAGCGATGGG  |
| KI1547 | targeting seq. | sa8     | cacc-AACATCAAATGCATCATCTT  |
| KI1548 | targeting seq. | sa8     | aaac-AAGATGATGCATTTGATGTT  |
| KI1703 | targeting seq. | ceo1-9  | cacc-ATATCTCACTACTATAAATG  |
| KI1704 | targeting seq. | ceo1-9  | aaac-CATTTATAGTAGTGAGATAT  |
| KI1705 | targeting seq. | ceo1-10 | cacc-TCCATGTGAAGGCGTGTGGT  |
| KI1706 | targeting seq. | ceo1-10 | aaac-ACCACACGCCTTCACATGGA  |
| KI1707 | targeting seq. | ceo1-11 | cacc-CCTATAACTGAATGGCTTGG  |
| KI1708 | targeting seq. | ceo1-11 | aaac-CCAAGCCATTCAGTTATAGG  |
| KI1709 | targeting seq. | ceo1-12 | cacc-GGCTCTTTAAGCTGTCTTTC  |
| KI1710 | targeting seq. | ceo1-12 | aaac-GAAAGACAGCTTAAAGAGCC  |
| KI1196 | targeting seq. | ceo2-1  | cacc-TATGAAGTATAAAGCGCTGA  |
| KI1197 | targeting seq. | ceo2-1  | aaac-TCAGCGCTTTATACTTCATA  |
| KI1198 | targeting seq. | ceo2-2  | cacc-AGATGGTGTATTACTTTAGT  |
| KI1199 | targeting seq. | ceo2-2  | aaac-ACTAAAGTAATACACCATCT  |
| KI1200 | targeting seq. | ceo2-3  | cacc-CAATTTTCGGTCGAAAATCAC |
| KI1201 | targeting seq. | ceo2-3  | aaac-GTGATTTTCGACCGAAATTG  |
| KI1202 | targeting seq. | ceo2-4  | cacc-CACTGGAAAATAAATACGC   |
| KI1203 | targeting seq. | ceo2-4  | aaac-GCGTATTTAGTTTTCCAGTG  |
| KI1255 | targeting seq. | ceo2-7  | cacc-AAACCAATTTTCATTCTTCCA |
| KI1256 | targeting seq. | ceo2-7  | aaac-TGGAAGAATGAAATTGGTTT  |
| KI1683 | targeting seq. | ceo2-9  | cacc-TACCACATTATGAAGTATAA  |
| KI1684 | targeting seq. | ceo2-9  | aaac-TTATACTTCATAATGTGGTA  |
| KI1685 | targeting seq. | ceo2-10 | cacc-TCATCAATCAACTCTCTAGT  |
| KI1686 | targeting seq. | ceo2-10 | aaac-ACTAGAGAGTTGATTGATGA  |
| KI2409 | targeting seq. | ceo2-12 | cacc-TGTCCCATGACATCTGATA   |
| KI2410 | targeting seq. | ceo2-12 | aaac-TATCAGATGTCAATGGGACA  |
| KI2411 | targeting seq. | ceo2-13 | cacc-TGATAAGGACACATTTAATA  |
| KI2412 | targeting seq. | ceo2-13 | aaac-TATTAAATGTGTCCTTATCA  |

|        |                |         |                            |
|--------|----------------|---------|----------------------------|
| KI1265 | targeting seq. | ceo3-1  | cacc-GCTACATAACCACTGACATTG |
| KI1266 | targeting seq. | ceo3-1  | aaac-CAATGTCAGTGGTATGTAGC  |
| KI1267 | targeting seq. | ceo3-2  | cacc-CTGTTGATGGAGTTGGCAAA  |
| KI1268 | targeting seq. | ceo3-2  | aaac-TTTGCCAACTCCATCAACAG  |
| KI1269 | targeting seq. | ceo3-3  | cacc-GATTGCGGTTTCAACAATTG  |
| KI1270 | targeting seq. | ceo3-3  | aaac-CAATTGTTGAAACCGCAATC  |
| KI1271 | targeting seq. | ceo3-4  | cacc-CAATTGCGGCCTTTAAATTC  |
| KI1272 | targeting seq. | ceo3-4  | aaac-GAATTTAAAGGCCGCAATTG  |
| KI2413 | targeting seq. | ceo3-5  | cacc-ATGAGCATCTAATTACACAT  |
| KI2414 | targeting seq. | ceo3-5  | aaac-ATGTGTAATTAGATGCTCAT  |
| KI1655 | targeting seq. | ceo4-5  | cacc-TGATTGAGATGTGCACTAAG  |
| KI1656 | targeting seq. | ceo4-5  | aaac-CTTAGTGCACATCTCAATCA  |
| KI1657 | targeting seq. | ceo4-6  | cacc-TAAGCATAAAGGTGAGGCTC  |
| KI1658 | targeting seq. | ceo4-6  | aaac-GAGCCTCACCTTTATGCTTA  |
| KI1693 | targeting seq. | ceo4-7  | cacc-TTGATTAACACTCGAGTCAA  |
| KI1694 | targeting seq. | ceo4-7  | aaac-TTGA CTGAGTGTTAATCAA  |
| KI1695 | targeting seq. | ceo4-8  | cacc-AATGGTAACTTGTGTAGTAT  |
| KI1696 | targeting seq. | ceo4-8  | aaac-ATACTACACAAGTTACCATT  |
| KI1697 | targeting seq. | ceo4-9  | cacc-CACTCGAGTCAATGGTAACT  |
| KI1698 | targeting seq. | ceo4-9  | aaac-AGTTACCATTGACTCGAGTG  |
| KI1699 | targeting seq. | ceo4-10 | cacc-AAGCATAAAGGTGAGGCTCT  |
| KI1700 | targeting seq. | ceo4-10 | aaac-AGAGCCTCACCTTTATGCTT  |
| KI1701 | targeting seq. | ceo4-11 | cacc-AACGAAGCATTATAAATGAT  |
| KI1702 | targeting seq. | ceo4-11 | aaac-ATCATTTATAATGCTTCGTT  |
| KI1188 | targeting seq. | ceo5-1  | cacc-AGGAATTGAAGATTGGAGTT  |
| KI1189 | targeting seq. | ceo5-1  | aaac-AACTCCAATCTTCAATTCTT  |
| KI1190 | targeting seq. | ceo5-2  | cacc-CAGGAATTGAAGATTGGAGT  |
| KI1191 | targeting seq. | ceo5-2  | aaac-ACTCCAATCTTCAATTCCTG  |
| KI1192 | targeting seq. | ceo5-3  | cacc-CAGAAATTCCACTATTAGAC  |
| KI1193 | targeting seq. | ceo5-3  | aaac-GTCTAATAGTGGAATTTCTG  |
| KI1194 | targeting seq. | ceo5-4  | cacc-AGACGGGATAAATGCTTAAT  |
| KI1195 | targeting seq. | ceo5-4  | aaac-ATTAAGCATTATCCCGTCT   |



|         |                |        |                           |
|---------|----------------|--------|---------------------------|
| KI1257  | targeting seq. | ceo6-1 | cacc-CCGCTTATGCTGAGGCAAAA |
| KI1258  | targeting seq. | ceo6-1 | aaac-TTTTGCCTCAGCATAAGCGG |
| KI1261  | targeting seq. | ceo6-3 | cacc-TGAGTGGAATTTGAGGAAAA |
| KI1262  | targeting seq. | ceo6-3 | aaac-TTTTCCTCAAATTCCACTCA |
| KI1263  | targeting seq. | ceo6-4 | cacc-GAGGAAAAAGGTGAGAAGTT |
| KI1264  | targeting seq. | ceo6-4 | aaac-AACTTCTCACCTTTTTCTC  |
| KI2415  | targeting seq. | ceo6-5 | cacc-TTTAATTAATCAAGAAAAAT |
| KI2416  | targeting seq. | ceo6-5 | aaac-ATTTTTCTTGATTAATTA   |
| KI2417  | targeting seq. | ceo6-6 | cacc-AAGTAGAAACATTTTTTTTC |
| KI2418  | targeting seq. | ceo6-6 | aaac-GAAAAAAAATGTTTCTACT  |
| KI1289  | targeting seq. | ceo7-1 | cacc-AGTATGTGTCGCAATATGGT |
| KI1290  | targeting seq. | ceo7-1 | aaac-ACCATATTGCGACACATACT |
| KI1291  | targeting seq. | ceo7-2 | cacc-ACATAGTATGTGTCGCAATA |
| KI1292  | targeting seq. | ceo7-2 | aaac-TATTGCGACACATACTATGT |
| KI1667  | targeting seq. | ceo7-5 | cacc-TACCTTCAAATAATTTGGGA |
| KI1668  | targeting seq. | ceo7-5 | aaac-TCCCAAATTATTTGAAGGTA |
| KI1689  | targeting seq. | ceo7-6 | cacc-ACAGAAGCAATGAAGGCTTA |
| KI1690  | targeting seq. | ceo7-6 | aaac-TAAGCCTTCATTGCTTCTGT |
| KI1691  | targeting seq. | ceo7-7 | cacc-AAATGGAATCAACTGAAGAA |
| KI1692  | targeting seq. | ceo7-7 | aaac-TTCTTCAGTTGATTCCATTT |
| KI915   | qPCR (ade6)    | NA     | GGCGCTGGTATATATGGTGTAG    |
| KI916   | qPCR (ade6)    | NA     | ATGGTGTAGTGACCTGAATTGT    |
| act1-Fw | qPCR (act1)    | NA     | CTTTCTACAACGAGCTTCGTGTTG  |
| act1-Rv | qPCR (act1)    | NA     | GAGTCATCTTCTCACGGTTGGAT   |
| KI1681  | qPCR (ceo1)    | NA     | GGAGGCTCTTTAAGCTGTCTTT    |
| KI1682  | qPCR (ceo1)    | NA     | CCAAGGCGCAGGGATTAAA       |
| KI1226  | qPCR (ceo2)    | NA     | CGAGACTGGTTTGCCATTTAC     |
| KI1227  | qPCR (ceo2)    | NA     | GCTATTATGTCCAACGCATCAC    |
| KI1335  | qPCR (ceo3)    | NA     | ACTCAACCCGTCCTTGTAAT      |
| KI1336  | qPCR (ceo3)    | NA     | CTTCATCAATTTGGGCATCGG     |
| KI1675  | qPCR (ceo4)    | NA     | CGATGAACGCATACAAACGG      |
| KI1676  | qPCR (ceo4)    | NA     | AGAATCCAATCATCGTGGTCTAA   |

|        |                     |                      |                           |
|--------|---------------------|----------------------|---------------------------|
| KI1222 | qPCR (ceo5)         | NA                   | AGACTGTTGAGGGAGCTTTG      |
| KI1223 | qPCR (ceo5)         | NA                   | GACCACACCACCCATTCTT       |
| KI1331 | qPCR (ceo6)         | NA                   | ATTAGCGTTGCTCTCCCTTC      |
| KI1332 | qPCR (ceo6)         | NA                   | TCGTCATAAACAACTTTCCATGC   |
| KI1341 | qPCR (ceo7)         | NA                   | TTAGTACTGCACCTGACTTGG     |
| KI1342 | qPCR (ceo7)         | NA                   | GAGATTCGCGGATATACGGATT    |
| KI2995 | nonsense<br>control | random<br>sequence 1 | cacc-TCTGGATTGACTCTATGACG |
| KI2996 | nonsense<br>control | random<br>sequence 1 | aaac-CGTCATAGAGTCAATCCAGA |

---

**Table S3. plasmids list**

| ID            | vector     | targeting<br>sequence ID<br>(sgRNA2) | targeting<br>sequence ID<br>(sgRNA1) | CRISPRi<br>effector | reference                  | comment                                                 |
|---------------|------------|--------------------------------------|--------------------------------------|---------------------|----------------------------|---------------------------------------------------------|
| pSPdCas9      | NA         | No sgRNA2                            | nonsense<br>(BbsI site)              | dCas9               | Ishikawa, <i>G3</i> , 2021 | Figure 1A                                               |
| pSPdCas9.2    | NA         | No sgRNA2                            | nonsense<br>(BbsI site)              | dCas9               | This work                  | Figure 1A (A cloning site is inserted at the SbfI site) |
| pSPdCas9.3    | NA         | No sgRNA2                            | nonsense<br>(PacCI site)             | dCas9               | This work                  | See materials and methods section.                      |
| pSPdCas9.5    | NA         | nonsense<br>(PacCI site)             | nonsense<br>(BbsI site)              | dCas9               | This work                  | Figure 1B                                               |
| pdSpG.2       | NA         | No sgRNA2                            | nonsense<br>(BbsI site)              | dSpG                | This work                  | Figure 1C                                               |
| pdSpG.5       | NA         | nonsense<br>(PacCI site)             | nonsense<br>(BbsI site)              | dSpG                | This work                  | Figure 1D                                               |
| pDC2_a5       | pSPdCas9.2 | No sgRNA2                            | a5                                   | dCas9               | This work                  | Figure 2                                                |
| pDC2_a10      | pSPdCas9.2 | No sgRNA2                            | a10                                  | dCas9               | This work                  | Figure 2                                                |
| pSC5(a5, ns)  | pSPdCas9.5 | a5                                   | nonsense<br>(BbsI site)              | dCas9               | This work                  | Figure 2                                                |
| pSC5(ns, a5)  | pSPdCas9.5 | nonsense<br>(PacCI site)             | a5                                   | dCas9               | This work                  | Figure 2                                                |
| pSC5(a5, a10) | pSPdCas9.5 | a5                                   | a10                                  | dCas9               | This work                  | Figure 2                                                |

|               |            |           |        |       |           |          |
|---------------|------------|-----------|--------|-------|-----------|----------|
| pSC5(a10, a5) | pSPdCas9.5 | a10       | a5     | dCas9 | This work | Figure 2 |
| pDS_sa1       | pdSpG.2    | No sgRNA2 | sa1    | dSpG  | This work | Figure 2 |
| pDS_sa2       | pdSpG.2    | No sgRNA2 | sa2    | dSpG  | This work | Figure 2 |
| pDS_sa3       | pdSpG.2    | No sgRNA2 | sa3    | dSpG  | This work | Figure 2 |
| pDS_sa4       | pdSpG.2    | No sgRNA2 | sa4    | dSpG  | This work | Figure 2 |
| pDS_sa5       | pdSpG.2    | No sgRNA2 | sa5    | dSpG  | This work | Figure 2 |
| pDS_sa6       | pdSpG.2    | No sgRNA2 | sa6    | dSpG  | This work | Figure 2 |
| pDS_sa7       | pdSpG.2    | No sgRNA2 | sa7    | dSpG  | This work | Figure 2 |
| pDS_sa8       | pdSpG.2    | No sgRNA2 | sa8    | dSpG  | This work | Figure 2 |
| pDC_ceo3-1    | pSPdCas9   | No sgRNA2 | ceo3-1 | dCas9 | This work | Figure 3 |
| pDC_ceo3-2    | pSPdCas9   | No sgRNA2 | ceo3-2 | dCas9 | This work | Figure 3 |
| pDC_ceo3-3    | pSPdCas9   | No sgRNA2 | ceo3-3 | dCas9 | This work | Figure 3 |
| pDC_ceo3-4    | pSPdCas9   | No sgRNA2 | ceo3-4 | dCas9 | This work | Figure 3 |
| pDC_ceo3-5    | pSPdCas9   | No sgRNA2 | ceo3-5 | dCas9 | This work | Figure 3 |
| pDC_ceo5-1    | pSPdCas9   | No sgRNA2 | ceo5-1 | dCas9 | This work | Figure 3 |
| pDC_ceo5-2    | pSPdCas9   | No sgRNA2 | ceo5-2 | dCas9 | This work | Figure 3 |
| pDC_ceo5-3    | pSPdCas9   | No sgRNA2 | ceo5-3 | dCas9 | This work | Figure 3 |
| pDC_ceo5-4    | pSPdCas9   | No sgRNA2 | ceo5-4 | dCas9 | This work | Figure 3 |
| pDC_ceo7-1    | pSPdCas9   | No sgRNA2 | ceo7-1 | dCas9 | This work | Figure 3 |
| pDC_ceo7-2    | pSPdCas9   | No sgRNA2 | ceo7-2 | dCas9 | This work | Figure 3 |
| pDC_ceo7-5    | pSPdCas9   | No sgRNA2 | ceo7-5 | dCas9 | This work | Figure 3 |
| pDC_ceo7-6    | pSPdCas9   | No sgRNA2 | ceo7-6 | dCas9 | This work | Figure 3 |
| pDC_ceo7-7    | pSPdCas9   | No sgRNA2 | ceo7-7 | dCas9 | This work | Figure 3 |

|                       |            |                                    |                         |       |           |           |
|-----------------------|------------|------------------------------------|-------------------------|-------|-----------|-----------|
| pDC_ ceo6-1           | pSPdCas9   | No sgRNA2                          | ceo6-1                  | dCas9 | This work | Figure 4  |
| pDC_ ceo6-3           | pSPdCas9   | No sgRNA2                          | ceo6-3                  | dCas9 | This work | Figure 4  |
| pDC_ ceo6-4           | pSPdCas9   | No sgRNA2                          | ceo6-4                  | dCas9 | This work | Figure 4  |
| pDC_ ceo6-5           | pSPdCas9   | No sgRNA2                          | ceo6-5                  | dCas9 | This work | Figure 4  |
| pDC_ ceo6-6           | pSPdCas9   | No sgRNA2                          | ceo6-6                  | dCas9 | This work | Figure 4  |
| pSC5(ceo6-1, ceo6-3)  | pSPdCas9.5 | ceo6-1                             | ceo6-3                  | dCas9 | This work | Figure 4  |
| pDC_ ceo1-9           | pSPdCas9   | No sgRNA2                          | ceo1-9                  | dCas9 | This work | Figure 4  |
| pDC_ ceo1-10          | pSPdCas9   | No sgRNA2                          | ceo1-10                 | dCas9 | This work | Figure 4  |
| pDC_ ceo1-11          | pSPdCas9   | No sgRNA2                          | ceo1-11                 | dCas9 | This work | Figure 4  |
| pDC_ ceo1-12          | pSPdCas9   | No sgRNA2                          | ceo1-12                 | dCas9 | This work | Figure 4  |
| pSC5(ceo1-9, ceo1-12) | pSPdCas9.5 | ceo1-9                             | ceo1-12                 | dCas9 | This work | Figure 4  |
| pDC_ ceo4-5           | pSPdCas9   | No sgRNA2                          | ceo4-5                  | dCas9 | This work | Figure 5  |
| pDC_ ceo4-6           | pSPdCas9   | No sgRNA2                          | ceo4-6                  | dCas9 | This work | Figure 5  |
| pDC_ ceo4-7           | pSPdCas9   | No sgRNA2                          | ceo4-7                  | dCas9 | This work | Figure 5  |
| pDS_ ceo4-8           | pSPdCas9   | No sgRNA2                          | ceo4-8                  | dSpG  | This work | Figure 5  |
| pDS_ ceo4-9           | pdSpG.2    | No sgRNA2                          | ceo4-9                  | dSpG  | This work | Figure 5  |
| pDS_ ceo4-10          | pdSpG.2    | No sgRNA2                          | ceo4-10                 | dSpG  | This work | Figure 5  |
| pDS_ ceo4-11          | pdSpG.2    | No sgRNA2                          | ceo4-11                 | dSpG  | This work | Figure 5  |
| pDS5(ceo4-10, ceo4-9) | pdSpG.5    | ceo4-10                            | ceo4-9                  | dSpG  | This work | Figure 5  |
| pDS_ a5               | pdSpG.2    | No sgRNA2                          | a5                      | dSpG  | This work | Figure S1 |
| pDC_ ceo2-1           | pSPdCas9   | No sgRNA2                          | ceo2-1                  | dCas9 | This work | Figure S2 |
| pDC_ ceo2-2           | pSPdCas9   | No sgRNA2                          | ceo2-2                  | dCas9 | This work | Figure S2 |
| pDC_ ceo2-3           | pSPdCas9   | No sgRNA2                          | ceo2-3                  | dCas9 | This work | Figure S2 |
| pDC_ ceo2-4           | pSPdCas9   | No sgRNA2                          | ceo2-4                  | dCas9 | This work | Figure S2 |
| pDC_ ceo2-12          | pSPdCas9   | No sgRNA2                          | ceo2-12                 | dCas9 | This work | Figure S2 |
| pDC_ ceo2-13          | pSPdCas9   | No sgRNA2                          | ceo2-13                 | dCas9 | This work | Figure S2 |
| pDS_ ceo2-7           | pdSpG.2    | No sgRNA2                          | ceo2-7                  | dSpG  | This work | Figure S2 |
| pDS_ ceo2-9           | pdSpG.2    | No sgRNA2                          | ceo2-9                  | dSpG  | This work | Figure S2 |
| pDS_ ceo2-10          | pdSpG.2    | No sgRNA2                          | ceo2-10                 | dSpG  | This work | Figure S2 |
| pSC5(ceo2-1, ceo2-12) | pSPdCas9.5 | ceo2-1                             | ceo2-12                 | dCas9 | This work | Figure S2 |
| pdSpG.6               | pdSpG.5    | nonsense<br>(random<br>sequence 1) | nonsense<br>(BbsI site) | dSpG  | This work | Figure S4 |
